# Supplementary material for: Iron phosphate nanoparticle catalyst for direct oxidation of methane into formaldehyde: effect of surface redox and acid–base properties
Source: Royal Society of Chemistry journal article supplement (doi:10.1039/d1cy01265g), 2021-01-01
Supplement: d1cy01265g1.pdf [file d1cy01265g1.pdf]

*Electronic supplementary information (ESI) for*

## Iron Phosphate Nanoparticle Catalyst for Direct Oxidation of Methane into Formaldehyde: Effect of Surface Redox and Acid-Base Properties

*Aoi Matsuda,<sup>a</sup> Haruka Tateno,<sup>a</sup> Keigo Kamata,<sup>\*abc</sup> and Michikazu Hara<sup>\*a</sup>*

<sup>a</sup> Laboratory for Materials and Structures, Institute of Innovative Research, Tokyo Institute of Technology, 4259 Nagatsuta-cho, Midori-ku, Yokohama, Kanagawa 226-8503, Japan

<sup>b</sup> Japan Science and Technology Agency (JST), Precursory Research for Embryonic Science and Technology (PRESTO), 4-1-8 Honcho, Kawaguchi, Saitama 332-0012, Japan

<sup>c</sup> JST, Core Research for Evolutional Science and Technology (CREST), 4-1-8 Honcho, Kawaguchi, Saitama 332-0012, Japan

E-mail: kamata.k.ac@m.titech.ac.jp, hara.m.ae@m.titech.ac.jp

### Experimental

**Materials.** Reagents such as  $\text{Fe}(\text{NO}_3)_3 \cdot 9\text{H}_2\text{O}$ ,  $\text{Fe}(\text{OAc})_2$ ,  $\text{NH}_4\text{H}_2\text{PO}_4$ , DL-malic acid, and L-aspartic acid were purchased from Kanto Chemical and used as-received. Distilled water was produced in-house using a water purifier (Yamato Auto Still WG202). Helium ( $\geq 99.99995\%$ ), methane ( $\geq 99.999\%$ ), oxygen ( $\geq 99.99995\%$ ), and nitrogen ( $\geq 99.99995\%$ ) were used as-received for the catalytic oxidation of methane.

**Instruments.** Bulk properties of solid materials were investigated by the following procedures.<sup>S1-S5</sup> Samples were identified by X-ray diffraction (XRD) using a diffractometer (MiniFlex, Rigaku) with Cu K $\alpha$  radiation ( $\lambda = 1.5405 \text{ \AA}$ , 40 kV–15 mA)

and equipped with a high-speed 1-dimensional detector (D/teX Ultra). Data were collected in the  $2\theta$  range of  $10\text{--}80^\circ$  in  $0.02^\circ$  steps with a continuous scanning rate of  $20^\circ \text{min}^{-1}$ . The chemical composition was analyzed using inductively coupled plasma-atomic emission spectroscopy (ICP-AES; ICPS-8100, Shimadzu). Diffuse reflectance infrared Fourier transform spectra were obtained using a spectrometer (FT/IR-6100, JASCO) equipped with a diffuse reflectance attachment.

Thermogravimetry-differential thermal analysis (TG-DTA) was performed using a differential thermal analyzer (DTG-60, Shimadzu), and the measurements were conducted under both reductive and oxidative conditions. First, the atmosphere of the furnace was replaced with  $\text{H}_2/\text{N}_2$  by pretreating the sample in a  $\text{H}_2/\text{N}_2$  ( $20/180 \text{ mL min}^{-1}$ ) flow at room temperature for 30 min prior to the measurement, and the temperature was increased from room temperature to  $650^\circ\text{C}$  at a heating rate of  $5^\circ\text{C min}^{-1}$  and held for 30 min in a  $\text{H}_2/\text{N}_2$  ( $20/180 \text{ mL min}^{-1}$ ) flow. After cooling to room temperature, the gas flow was changed to  $\text{O}_2$  ( $200 \text{ mL min}^{-1}$ ) and held for 30 min. The atmosphere of the furnace was then replaced with  $\text{O}_2$  by pretreating the sample in a  $\text{O}_2$  ( $200 \text{ mL min}^{-1}$ ) flow at room temperature for 30 min prior to the measurement, after which the temperature was increased from room temperature to  $650^\circ\text{C}$  at a heating rate of  $5^\circ\text{C min}^{-1}$  and held for 30 min in an  $\text{O}_2$  ( $200 \text{ mL min}^{-1}$ ) flow.

$\text{H}_2$  temperature-programmed reduction ( $\text{H}_2$ -TPR) profiles were measured on a chemisorption analyzer (BELCAT-A, BEL Japan) equipped with a thermal conductivity detector (TCD) to measure changes in the decrease of  $\text{H}_2$  in the gas stream. 50 mg of sample was placed in a quartz cell and then heated from  $50$  to  $700^\circ\text{C}$  at a rate of  $5^\circ\text{C min}^{-1}$  under 5%  $\text{H}_2/\text{Ar}$  flow ( $50 \text{ mL min}^{-1}$ ).

The surface properties of the solid materials were investigated by the following procedures.<sup>S1-S5</sup> The specific surface area was determined by nitrogen adsorption-desorption isotherms measured at  $-196^\circ\text{C}$  with an automatic surface area and porosimetry analyzer (Tristar II, Micromeritics), and the Brunauer-Emmett-Teller (BET) surface area was estimated over the relative pressure ( $P/P_0$ ) range of  $0.05\text{--}0.30$ . The sample was heated at  $150^\circ\text{C}$  for 2 h under vacuum prior to the measurements, and the BET method was utilized to calculate the specific surface area. The morphology was characterized using scanning electron microscopy (SEM; S-4800, Hitachi). After directly mixing Cu grids with samples, the Cu grids were collected and mounted on a stage. X-ray photoelectron spectroscopy (XPS) data were collected on a spectrometer (ESCA-3400HSE, Shimadzu) with a standard Mg  $K\alpha$  source ( $1253.6 \text{ eV}$ ) operated at 10

kV and 25 mA. Samples were pressed into pellets and fixed on a piece of double-sided carbon tape. The binding energy was calibrated assuming the binding energy of the C 1s line to be 284.6 eV.

**Procedure for IR measurements.** The amounts of Lewis and Bronsted acid sites on FePO<sub>4</sub>-MA and Fe<sub>2</sub>O<sub>3</sub> catalysts were estimated from FT-IR measurements for pyridine-adsorbed samples at 25 °C.<sup>S5-S7</sup> Samples were pressed into self-supporting disks (20 mm diameter, 17.8 mg and 78.6 mg for FePO<sub>4</sub>-MA and Fe<sub>2</sub>O<sub>3</sub>, respectively) and placed in an IR cell attached to a closed glass-circulation system. Prior to pyridine adsorption, the sample was dehydrated by heating at 300 °C for 1 h under vacuum. The intensity of the band at 1450 cm<sup>-1</sup> (pyridine coordinatively bonded to Lewis acid sites, molecular absorption coefficient: 4.5 and 1.8 cm<sup>2</sup>·μmol<sup>-1</sup> for FePO<sub>4</sub>-MA and Fe<sub>2</sub>O<sub>3</sub>, respectively) was plotted against the amount of pyridine adsorbed on the Lewis acid sites of the samples. The band intensity increased with the amount of chemisorbed pyridine and reached a plateau with the appearance of the band due to physisorbed pyridine (ca. 1440 cm<sup>-1</sup>). While the band around 1440 cm<sup>-1</sup> disappeared after evacuation at room temperature for 4 h, there was no significant difference in the intensity of the 1446 cm<sup>-1</sup> band before and after evacuation, which indicated that the maximum intensity of the 1446 cm<sup>-1</sup> band corresponded to the amount of Lewis acid sites available to chemisorb pyridine until saturation. The amounts of Lewis acid sites on FePO<sub>4</sub>-MA and Fe<sub>2</sub>O<sub>3</sub> were estimated to be 13 and 50 μmol g<sup>-1</sup>, respectively, from the maximum band intensities and molecular absorption coefficient at 1446 cm<sup>-1</sup>. The relationship among the surface Lewis acid sites, surface active sites, and CH<sub>4</sub> oxidation performance is discussed in “3.1 Synthesis and characterization of iron-based catalysts” and “3.4 Acid-base properties of iron-based catalysts”. For IR measurements with chloroform-adsorbed samples at 25 °C, a dehydrated sample (by heating at 300 °C for 1 h under vacuum) was exposed to chloroform vapor, and Fig. 10(a) shows IR spectra for FePO<sub>4</sub>-MA and Fe<sub>2</sub>O<sub>3</sub> at gas-phase chloroform pressures of 2.7×10<sup>-2</sup> and 1.4×10<sup>-2</sup> kPa, respectively. IR measurements with acetone and methanol-adsorbed samples at 25 °C were prepared by exposure of the dehydrated sample (by heating at 300 °C for 1 h under vacuum) to saturated acetone and methanol vapor followed by evacuation at 25 °C for 30 min to remove weakly physisorbed acetone and methanol.

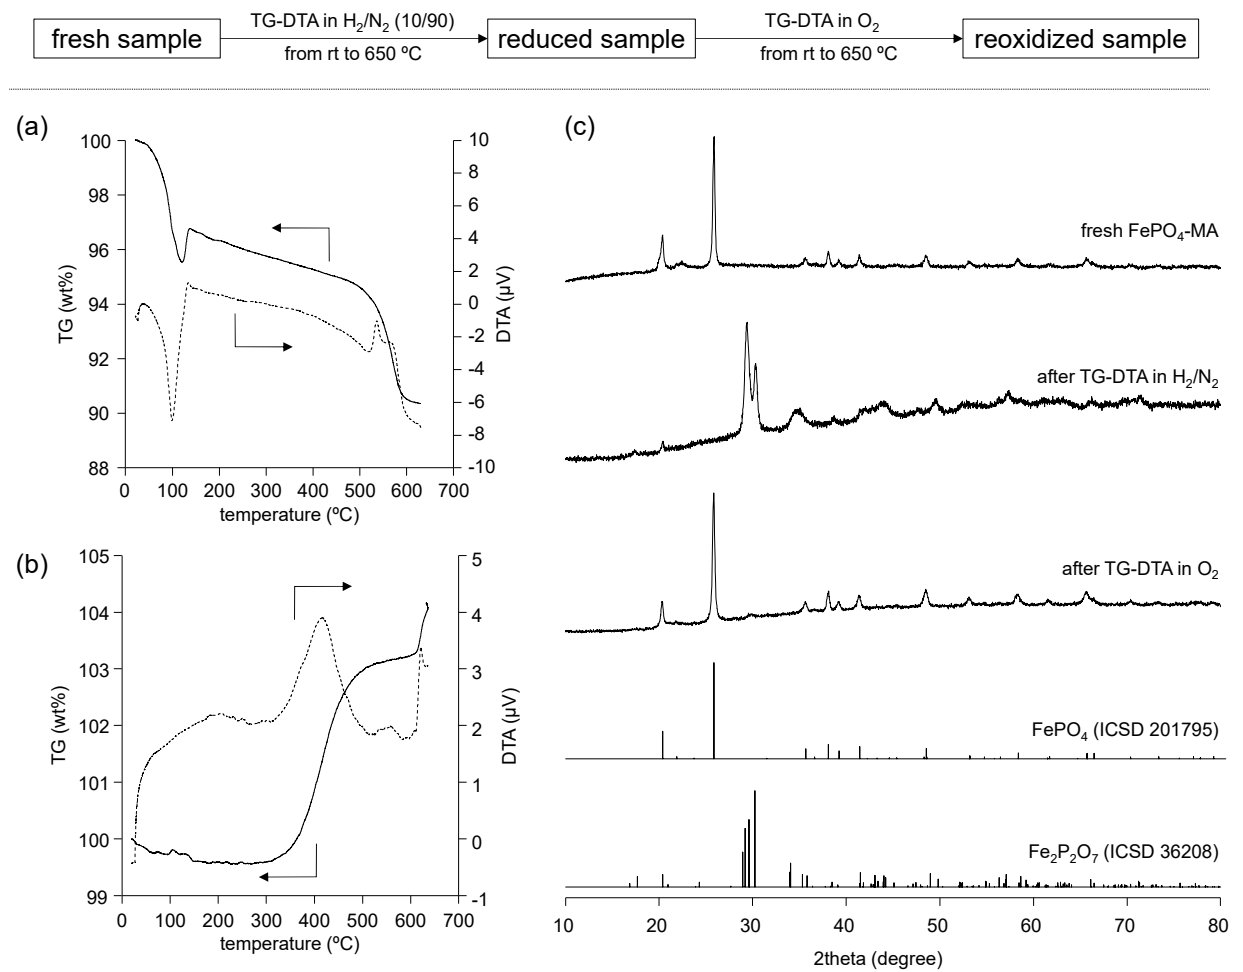

**Fig. S1** TG-DTA profiles for (a) fresh FePO<sub>4</sub>-MA in H<sub>2</sub>/N<sub>2</sub> (10/90, v/v) and (b) reduced FePO<sub>4</sub>-MA in O<sub>2</sub>. (c) XRD patterns for fresh FePO<sub>4</sub>-MA, reduced FePO<sub>4</sub>-MA, reoxidized FePO<sub>4</sub>-MA, FePO<sub>4</sub> (ICSD 201795), and Fe<sub>2</sub>P<sub>2</sub>O<sub>7</sub> (ICSD 36208).

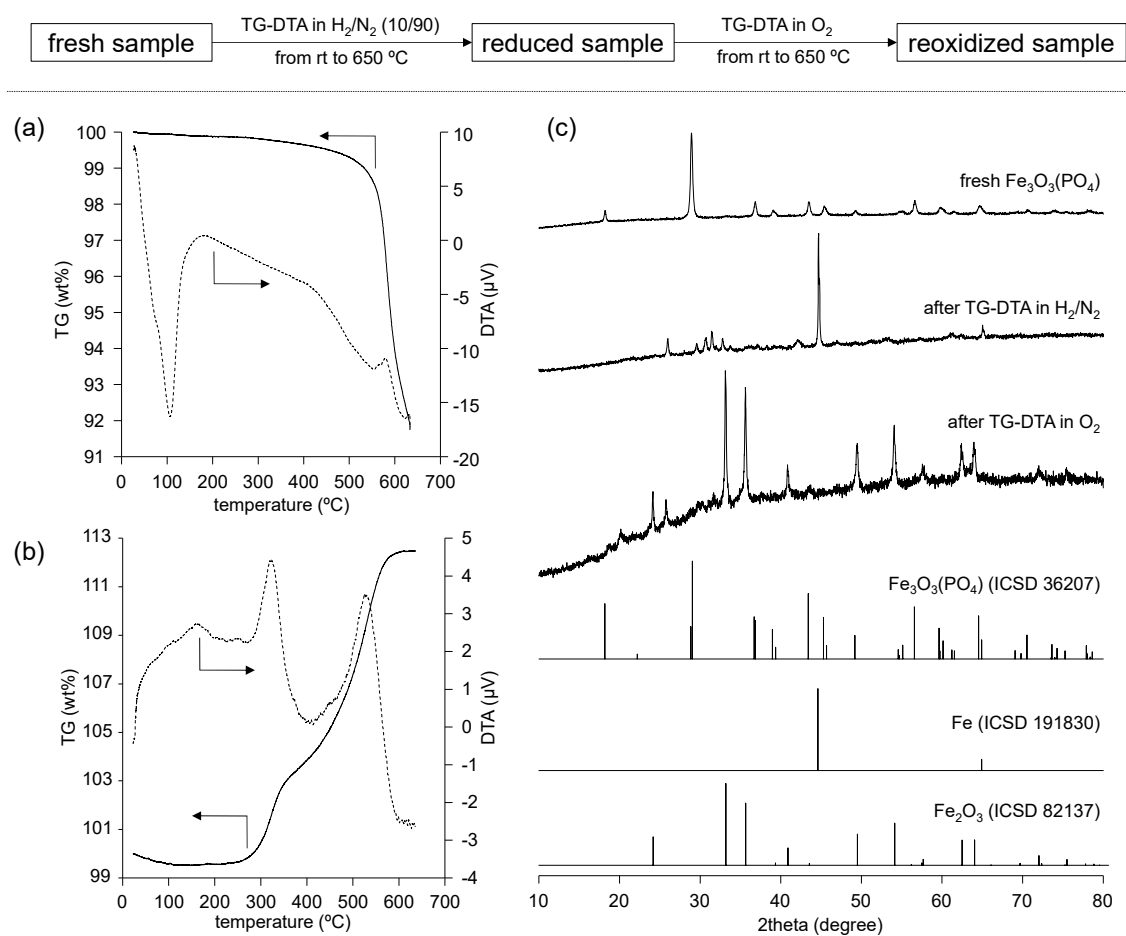

**Fig. S2** TG-DTA profiles for (a) fresh  $\text{Fe}_3\text{O}_3(\text{PO}_4)$  in  $\text{H}_2/\text{N}_2$  (10/90, v/v) and (b) reduced  $\text{Fe}_3\text{O}_3(\text{PO}_4)$  in  $\text{O}_2$ . (c) XRD patterns for fresh  $\text{Fe}_3\text{O}_3(\text{PO}_4)$ , reduced  $\text{Fe}_3\text{O}_3(\text{PO}_4)$ , reoxidized  $\text{Fe}_3\text{O}_3(\text{PO}_4)$ ,  $\text{Fe}_3\text{O}_3(\text{PO}_4)$  (ICSD 36207), Fe (ICSD 191830), and  $\text{Fe}_2\text{O}_3$  (ICSD 82137).

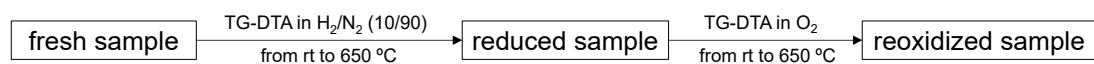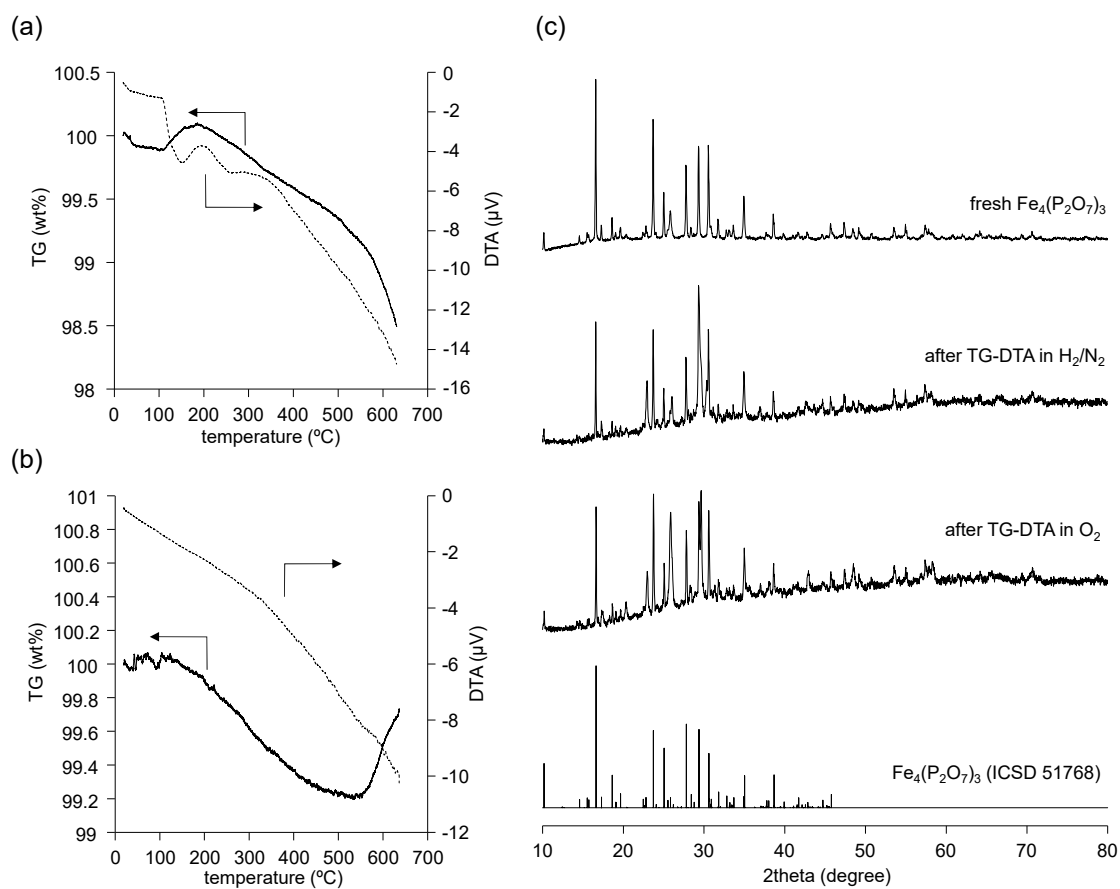

**Fig. S3** TG-DTA profiles for (a) fresh  $\text{Fe}_4(\text{P}_2\text{O}_7)_3$  in  $\text{H}_2/\text{N}_2$  (10/90, v/v) and (b) reduced  $\text{Fe}_4(\text{P}_2\text{O}_7)_3$  in  $\text{O}_2$ . (c) XRD patterns for fresh  $\text{Fe}_4(\text{P}_2\text{O}_7)_3$ , reduced  $\text{Fe}_4(\text{P}_2\text{O}_7)_3$ , reoxidized  $\text{Fe}_4(\text{P}_2\text{O}_7)_3$ , and  $\text{Fe}_4(\text{P}_2\text{O}_7)_3$  (ICSD 51768).

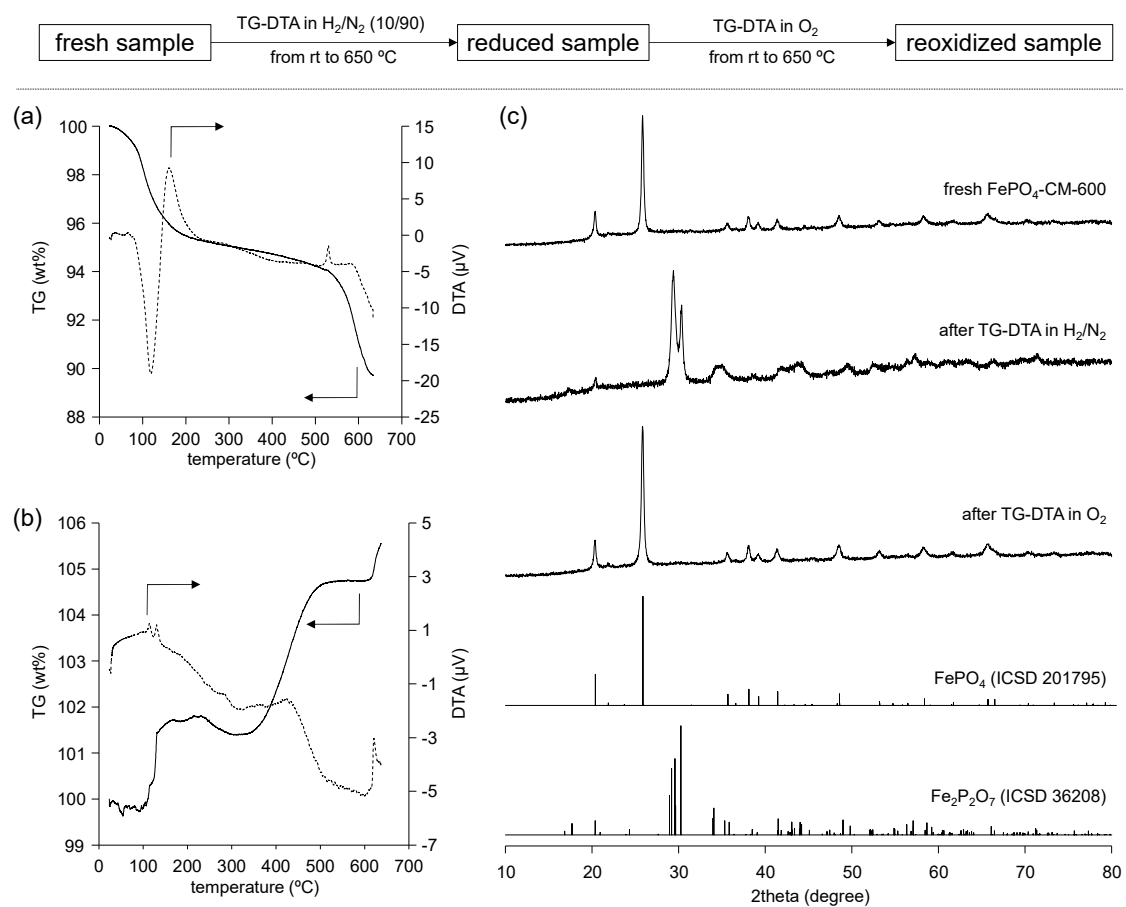

**Fig. S4** TG-DTA profiles for (a) fresh FePO<sub>4</sub>-CM-600 in H<sub>2</sub>/N<sub>2</sub> (10/90, v/v) and (b) reduced FePO<sub>4</sub>-CM-600 in O<sub>2</sub>. (c) XRD patterns for fresh FePO<sub>4</sub>-CM-600, reduced FePO<sub>4</sub>-CM-600, reoxidized FePO<sub>4</sub>-CM-600, FePO<sub>4</sub> (ICSD 201795), and Fe<sub>2</sub>P<sub>2</sub>O<sub>7</sub> (ICSD 36208).

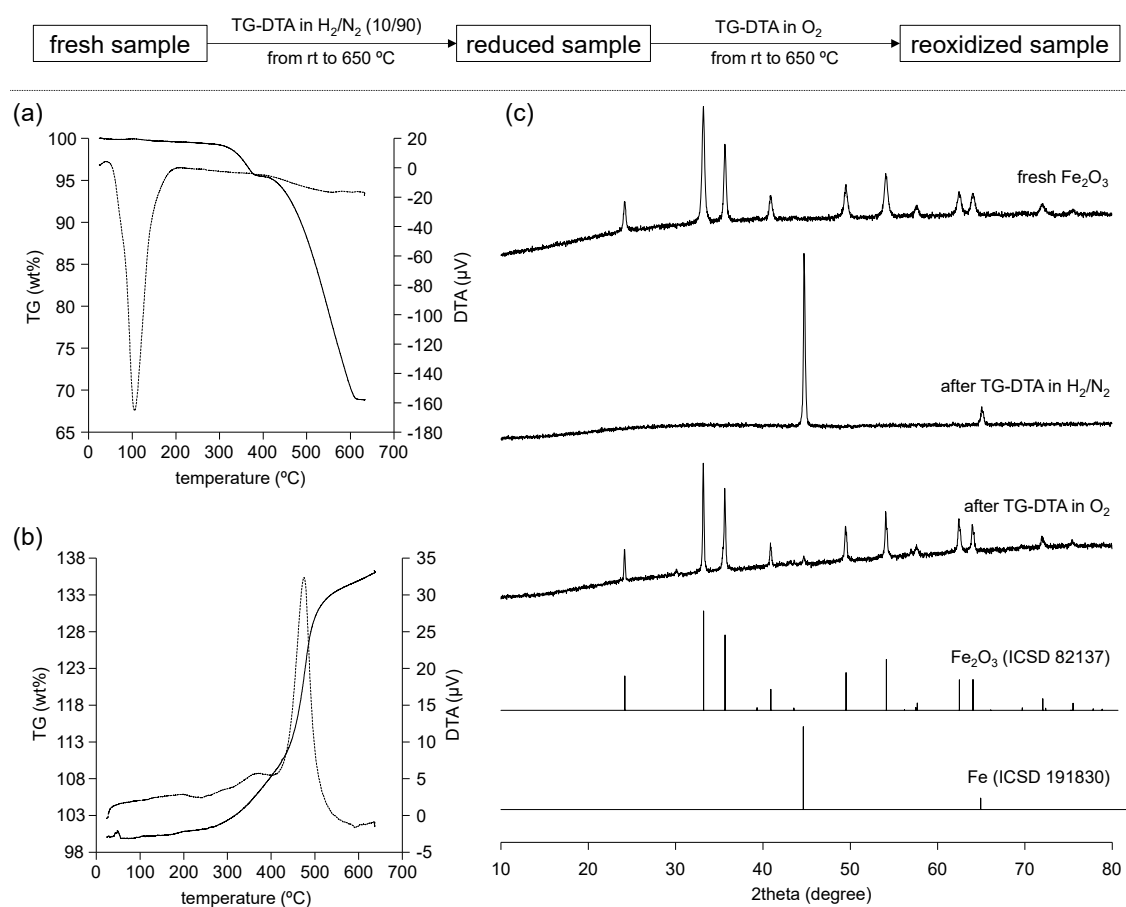

**Fig. S5** TG-DTA profiles for (a) fresh  $\text{Fe}_2\text{O}_3$  in  $\text{H}_2/\text{N}_2$  (10/90, v/v) and (b) reduced  $\text{Fe}_2\text{O}_3$  in  $\text{O}_2$ . (c) XRD patterns for fresh  $\text{Fe}_2\text{O}_3$ , reduced  $\text{Fe}_2\text{O}_3$ , reoxidized  $\text{Fe}_2\text{O}_3$ ,  $\text{Fe}_2\text{O}_3$  (ICSD 82137), and Fe (ICSD 191830).



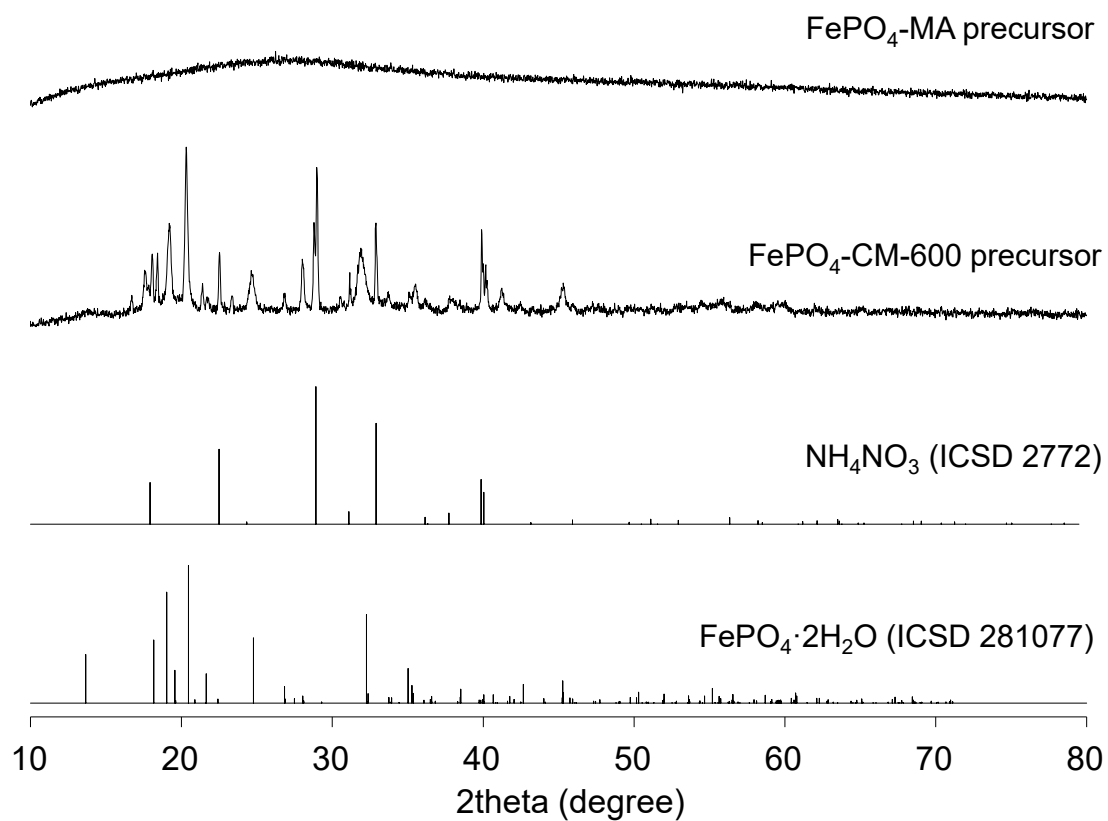

**Fig. S6** XRD patterns for the precursors of FePO<sub>4</sub>-MA and FePO<sub>4</sub>-CM-600, NH<sub>4</sub>NO<sub>3</sub> (ICSD 2772), and FePO<sub>4</sub>·2H<sub>2</sub>O (ICSD 281077).

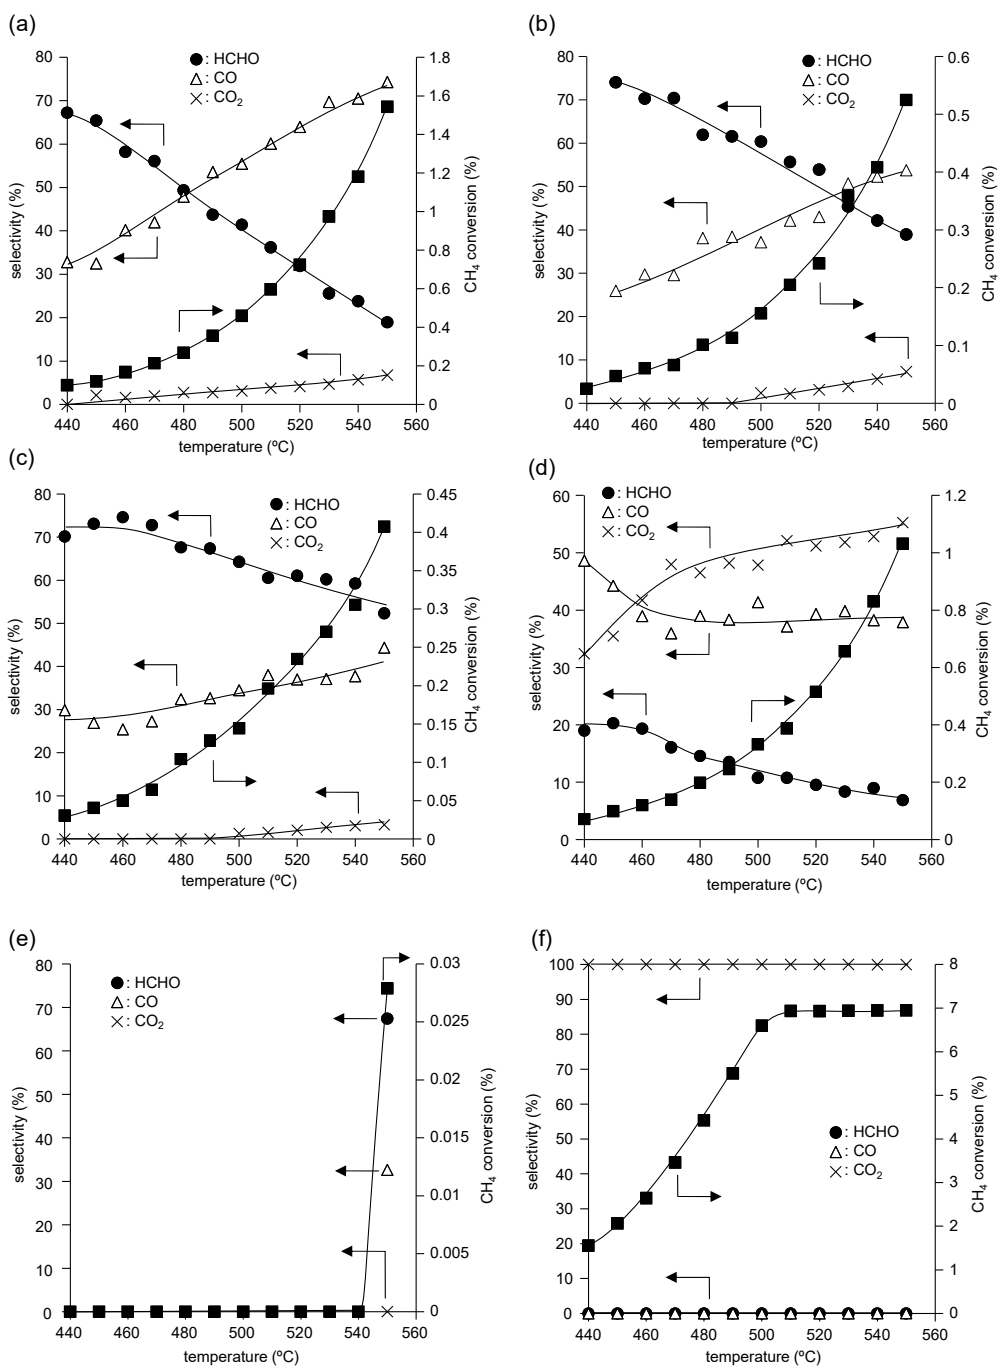

**Fig. S7** CH<sub>4</sub> conversion and product selectivity as function of reaction temperature for oxidation of CH<sub>4</sub> with O<sub>2</sub> over (a) FePO<sub>4</sub>-MA, (b) FePO<sub>4</sub>-CM-550, (c) FePO<sub>4</sub>-CM-600, (d) Fe<sub>3</sub>O<sub>3</sub>(PO<sub>4</sub>), (e) Fe<sub>4</sub>(P<sub>2</sub>O<sub>7</sub>)<sub>3</sub>, and (f) Fe<sub>2</sub>O<sub>3</sub> catalysts. Reaction conditions: catalyst (50 mg), CH<sub>4</sub>/O<sub>2</sub>/N<sub>2</sub> (7/1/8 sccm), 440–550 °C.

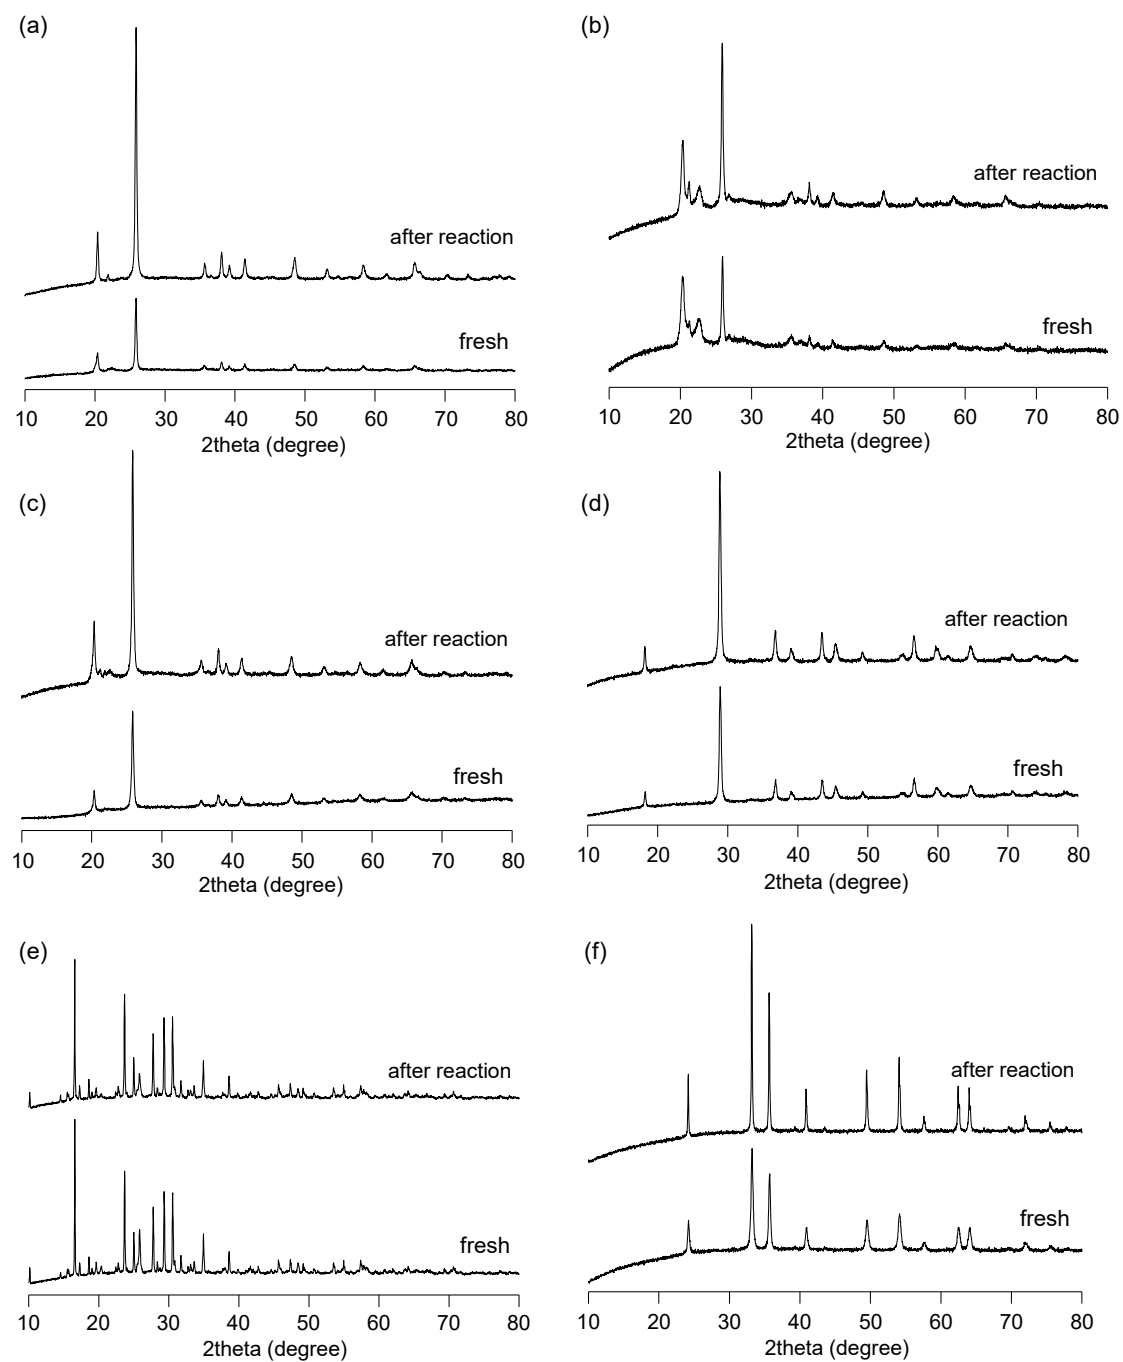

**Fig. S8** XRD patterns for fresh and recovered catalysts after oxidation of CH<sub>4</sub> under same conditions as those in Fig. S6; (a) FePO<sub>4</sub>-MA, (b) FePO<sub>4</sub>-CM-550, (c) FePO<sub>4</sub>-CM-600, (d) Fe<sub>3</sub>O<sub>3</sub>(PO<sub>4</sub>), (e) Fe<sub>4</sub>(P<sub>2</sub>O<sub>7</sub>)<sub>3</sub>, and (f) Fe<sub>2</sub>O<sub>3</sub>.

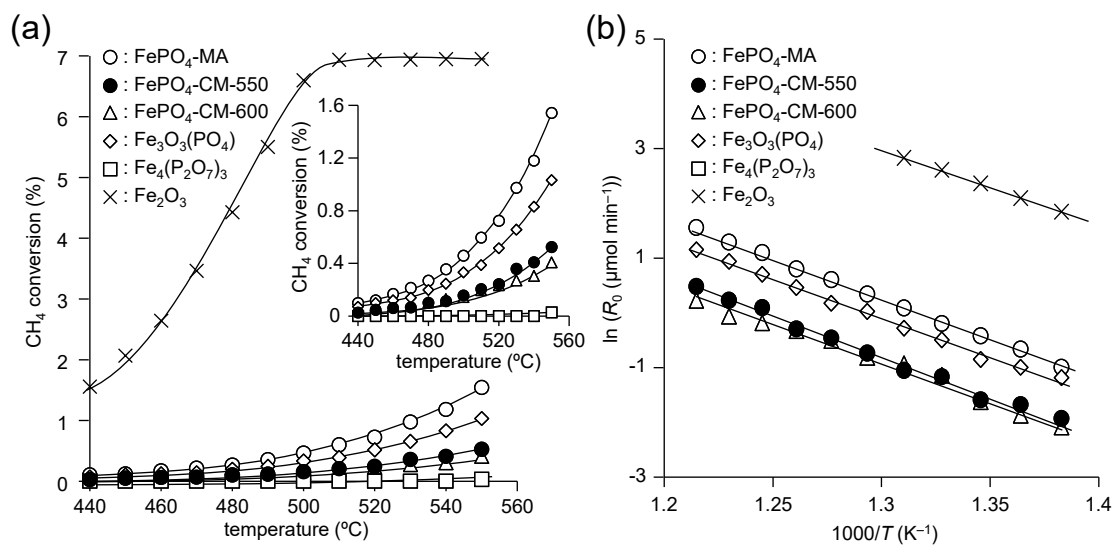

**Fig. S9** (a) CH<sub>4</sub> conversion as function of reaction temperature and (b) Arrhenius plots for oxidation of methane over FePO<sub>4</sub>-MA, FePO<sub>4</sub>-CM-550, FePO<sub>4</sub>-CM-600, Fe<sub>3</sub>O<sub>3</sub>(PO<sub>4</sub>), Fe<sub>4</sub>(P<sub>2</sub>O<sub>7</sub>)<sub>3</sub>, Fe<sub>2</sub>O<sub>3</sub> catalysts. Inset for (a): data for iron phosphate catalysts in CH<sub>4</sub> conversion region of 0–1.6%. Reaction conditions: catalyst (50 mg), CH<sub>4</sub>/O<sub>2</sub>/N<sub>2</sub> (7/1/8 sccm), 440–550 °C. R<sub>0</sub> values were determined by CH<sub>4</sub> conversion.

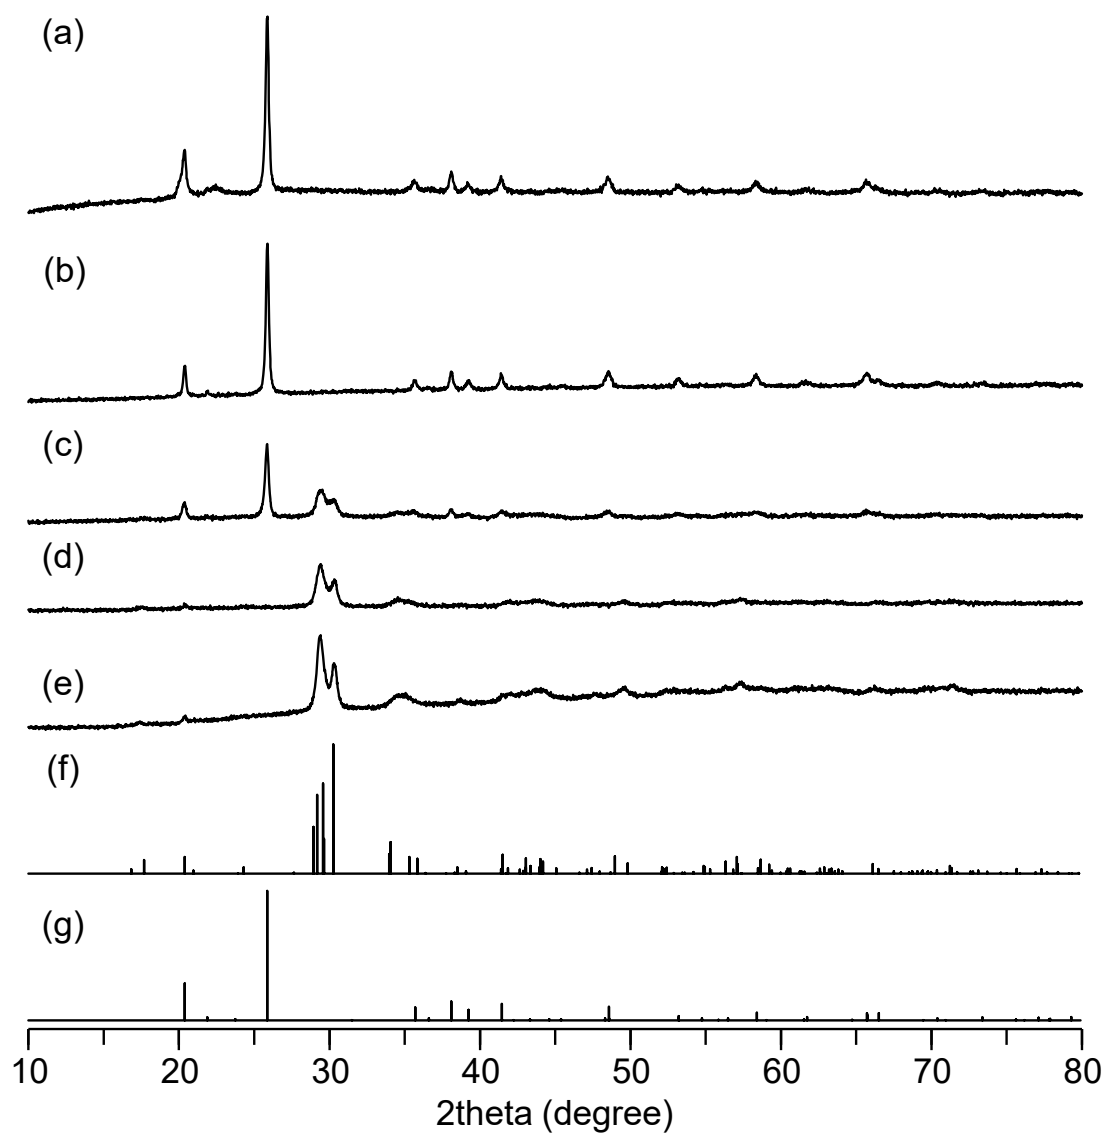

**Fig. S10** XRD patterns for (a) fresh  $\text{FePO}_4\text{-MA}$ , and  $\text{FePO}_4\text{-MA}$  reduced with  $\text{H}_2$  at (b) 500, (c) 550, (d) 600, and (e) 650 °C, (f)  $\text{Fe}_2\text{P}_2\text{O}_7$  (ICSD 36208), and (g)  $\text{FePO}_4$  (ICSD 201795). Reduction of the samples was performed in a TG-DTA furnace under the conditions given in Fig. S1(a).

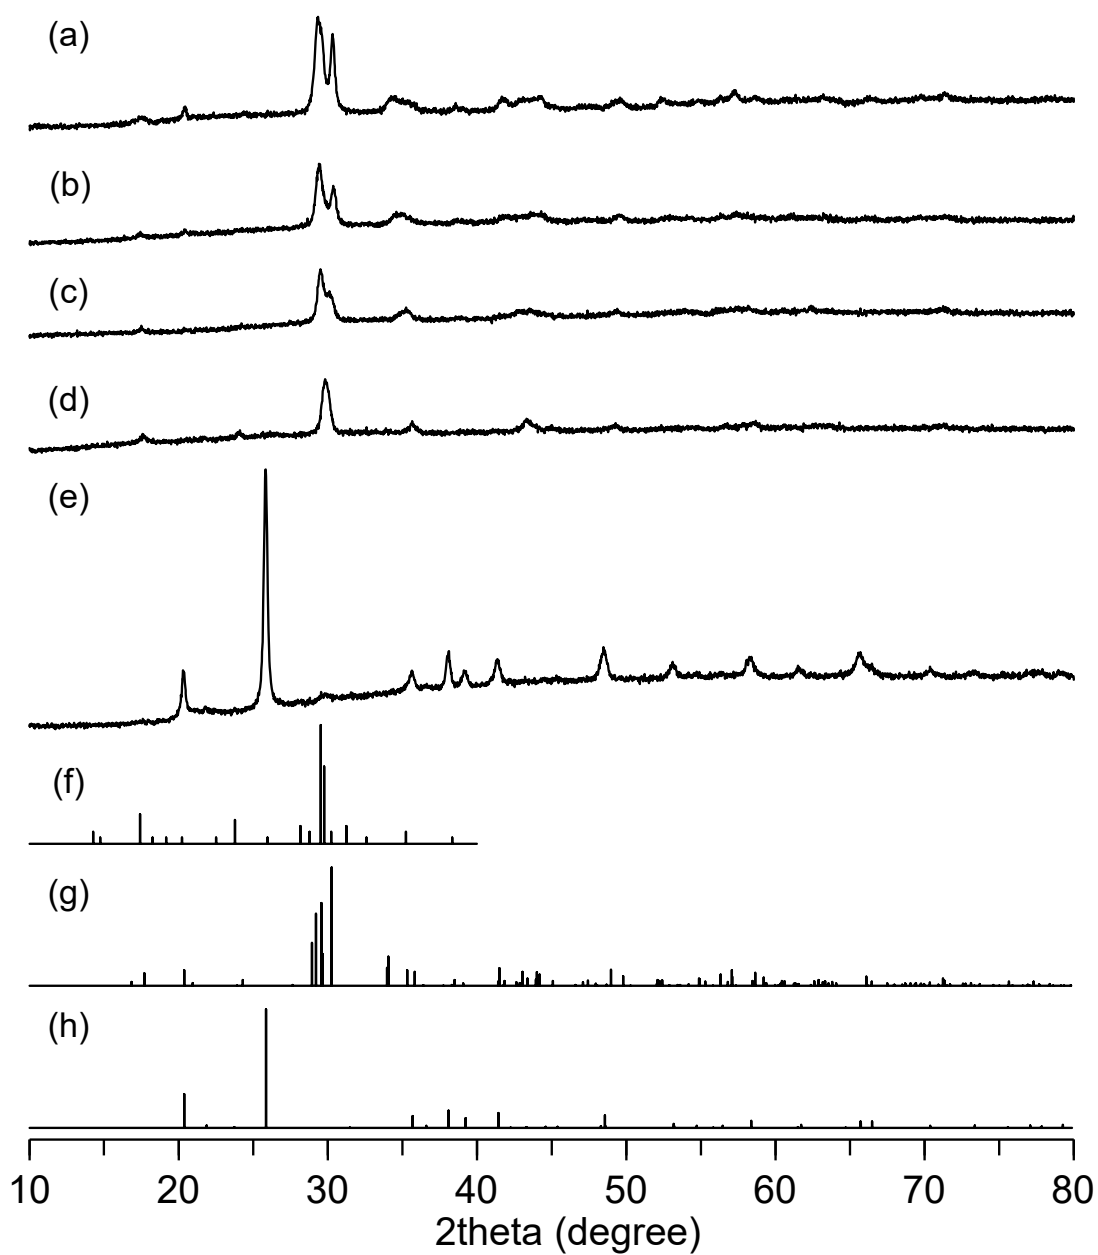

**Fig. S11** XRD patterns for (a) fresh Fe<sub>2</sub>P<sub>2</sub>O<sub>7</sub> (prepared by reduction of FePO<sub>4</sub>-MA), and Fe<sub>2</sub>P<sub>2</sub>O<sub>7</sub> reoxidized with O<sub>2</sub> at (b) 300, (c) 400, (d) 500, and (e) 650 °C, (f) α-Fe<sub>3</sub>(P<sub>2</sub>O<sub>7</sub>)<sub>2</sub> (detailed data are shown in Refs. S8 and S9), (g) Fe<sub>2</sub>P<sub>2</sub>O<sub>7</sub> (ICSD 36208), and (h) FePO<sub>4</sub> (ICSD 201795). Reoxidation of the samples was performed in a TG-DTA furnace under the conditions given in Fig. S1(b).

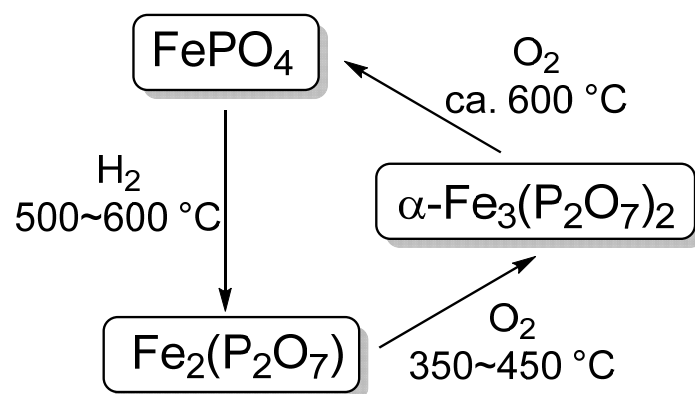

**Fig. S12** Possible reaction pathways for redox cycle between  $\text{FePO}_4$  and  $\text{Fe}_2\text{P}_2\text{O}_7$ .

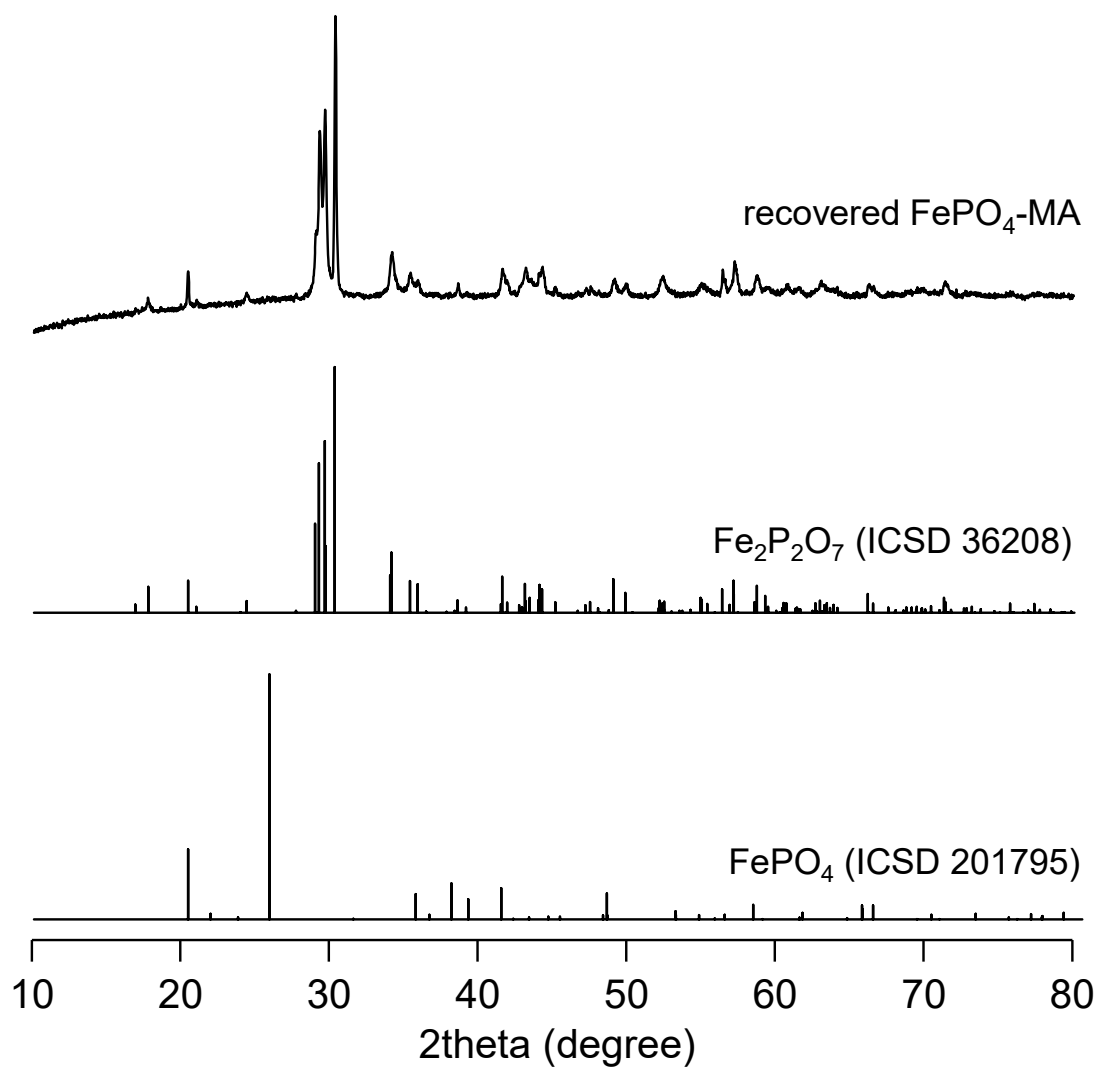

**Fig. S13** XRD patterns for recovered FePO<sub>4</sub>-MA after temperature-programmed reaction measurement as shown in Fig. 6, Fe<sub>2</sub>P<sub>2</sub>O<sub>7</sub> (ICSD 36208), and FePO<sub>4</sub> (ICSD 201795).



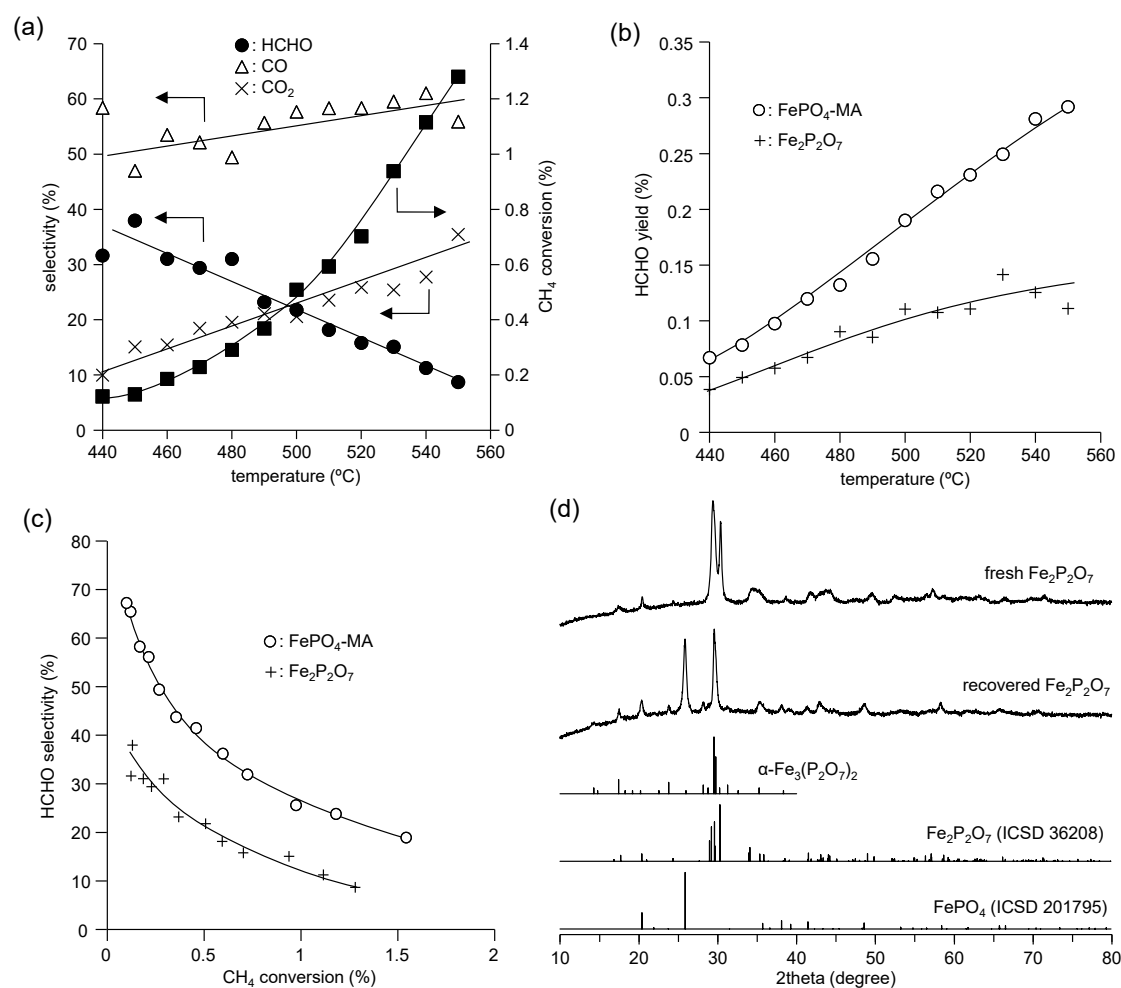

**Fig. S14** (a) CH<sub>4</sub> conversion, product selectivity, and (b) HCHO yield as function of reaction temperature, and (c) selectivity to HCHO as function of CH<sub>4</sub> conversion for oxidation of methane with O<sub>2</sub> over Fe<sub>2</sub>P<sub>2</sub>O<sub>7</sub>. Reaction conditions: catalyst (50 mg), CH<sub>4</sub>/O<sub>2</sub>/N<sub>2</sub> (7/1/8 sccm), 440–550 °C. (d) XRD patterns for fresh Fe<sub>2</sub>P<sub>2</sub>O<sub>7</sub>, recovered Fe<sub>2</sub>P<sub>2</sub>O<sub>7</sub> after oxidation,  $\alpha\text{-Fe}_3(\text{P}_2\text{O}_7)_2$  (detailed data are shown in Refs. S8 and S9), Fe<sub>2</sub>P<sub>2</sub>O<sub>7</sub> (ICSD 36208), and FePO<sub>4</sub> (ICSD 201795).

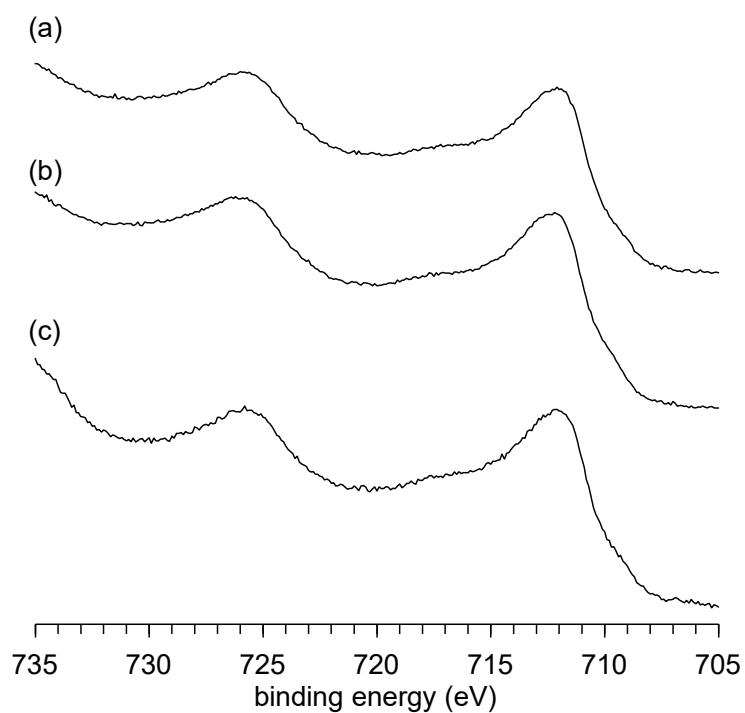

**Fig. S15** XPS Fe 2p spectra for (a) fresh FePO<sub>4</sub>-MA, (b) recovered FePO<sub>4</sub>-MA after oxidation of CH<sub>4</sub> under conditions given in Fig. S7, and (c) recovered FePO<sub>4</sub>-MA after pulse reaction experiments under conditions given in Fig. 8(a).

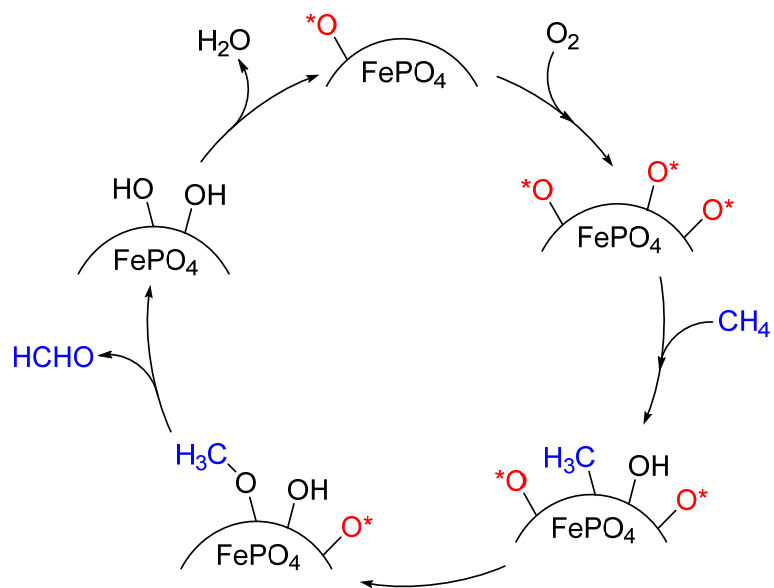

**Fig. S16** Proposed reaction mechanism for oxidation of CH<sub>4</sub> with O<sub>2</sub> over FePO<sub>4</sub> catalyst reported in Refs. S10 and S11. O\*: lattice oxygen atoms in surface region.

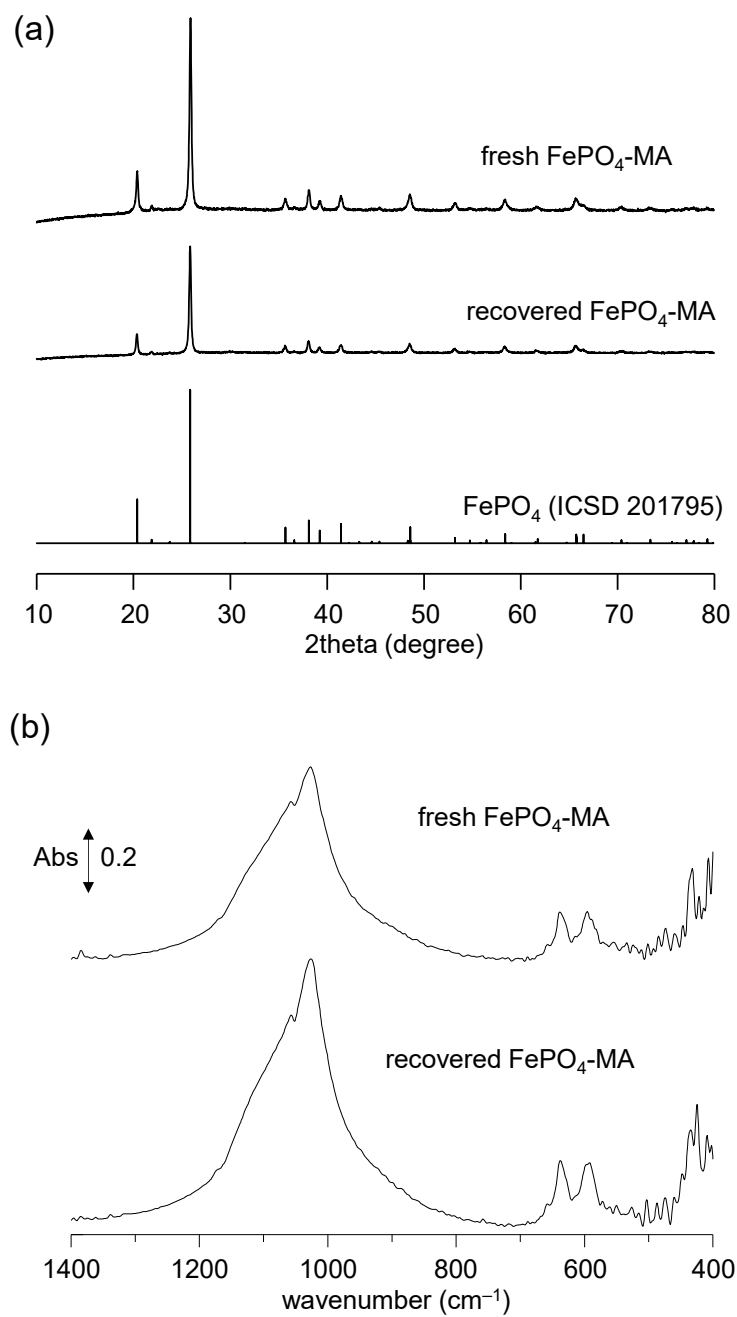

**Fig. S17** (a) XRD patterns and (b) IR spectra for fresh and recovered FePO<sub>4</sub>-MA after pulse-experiments as shown in Fig. 8.

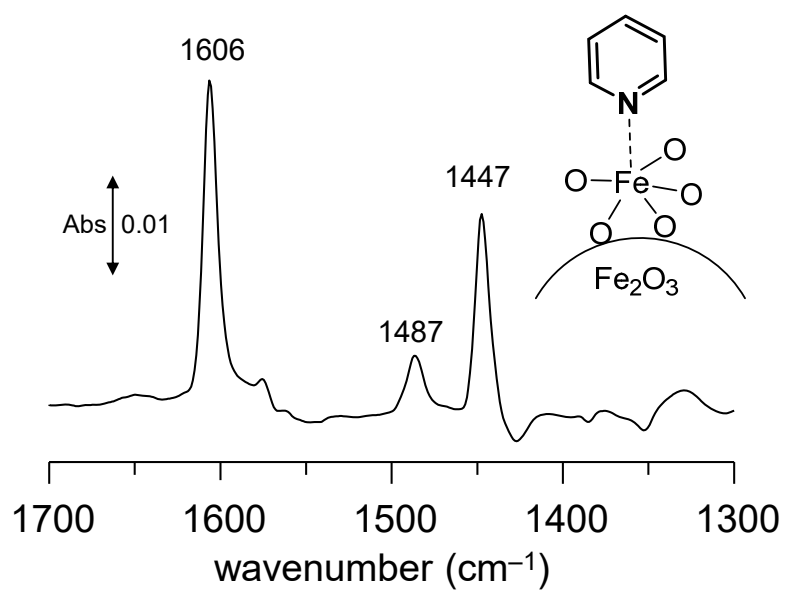

**Fig. S18** Difference IR spectra for pyridine-adsorbed Fe<sub>2</sub>O<sub>3</sub> at 25 °C.

## References

- (S1) Y. Yamaguchi, R. Aono, E. Hayashi, K. Kamata and M. Hara, *ACS Appl. Mater. Interfaces*, 2020, **12**, 36004–36013.
- (S2) E. Hayashi, Y. Yamaguchi, K. Kamata, N. Tsunoda, Y. Kumagai, F. Oba and M. Hara, *J. Am. Chem. Soc.*, 2019, **141**, 890–900.
- (S3) K. Kamata, K. Sugahara, Y. Kato, S. Muratsugu, Y. Kumagai, F. Oba, M. Hara, *ACS Appl. Mater. Interfaces*, 2018, **10**, 23792–23801.
- (S4) K. Sugahara, K. Kamata, S. Muratsugu and M. Hara, *ACS Omega*, 2017, **2**, 1608–1616.
- (S5) S. Kanai, I. Nagahara, Y. Kita, K. Kamata and M. Hara, *Chem. Sci.*, 2017, **8**, 3146–3153.
- (S6) T. Komanoya, K. Nakajima, M. Kitano and M. Hara, *J. Phys. Chem. C*, 2015, **119**, 26540–26546.
- (S7) K. Nakajima, Y. Baba, R. Noma, M. Kitano, J. N. Kondo, S. Hayashi and M. Hara, *J. Am. Chem. Soc.*, 2011, **133**, 4224–4227.
- (S8) J.-M. M. Millet, *Catal. Rev. - Sci. Eng.*, 1998, **40**, 1–38.
- (S9) J.-M. M. Millet, J. C. Viedrine, G. Hecquet, *Stud. Surf. Sci. Catal.*, 1990, **55**, 833–841.
- (S10) Y. Wang and K. Otsuka, *J. Catal.*, 1995, **155**, 256–267.
- (S11) Y. Wang, X. Wang, Z. Su, Q. Guo, Q. Tang, Q. Zhang and H. Wan, *Catal. Today*, 2004, **93-95**, 155–161.
